# Supplementary material for: The Structural Basis for the Integrity of Adenovirus Ad3 Dodecahedron
Source: PubMed Central journal article supplement (PMC3457955; doi:10.1371/journal.pone.0046075), 2012-09-25
Supplement: pone.0046075.s001.pdf [file pone.0046075.s001.pdf]

**Table S1. Data collection statistics.** Values for the outer shell are given in parentheses.

|                               | <b>Cubic crystals</b>                                                  | <b>Orthorhombic crystals</b>                                              |
|-------------------------------|------------------------------------------------------------------------|---------------------------------------------------------------------------|
|                               | Spacegroup $P2_13$                                                     | Spacegroup $P2_12_12_1$                                                   |
| Crystallization               | Reservoir 12 % PEG 8000, 100 mM HEPES pH 6.5, 100 mM CaCl <sub>2</sub> | Reservoir 10-15 % PEG 8000, 100 mM HEPES pH 6.5, 100 mM CaCl <sub>2</sub> |
| Cell parameters (Å)           | a=342.7 b=342.7 c=342.7                                                | a=346.0 b=348.6 c= 372.9                                                  |
| X-ray source                  | ESRF beamline ID14-3                                                   | ESRF beamline ID23-1                                                      |
| Wavelength (Å)                | 0.931                                                                  | 1.033                                                                     |
| Detector                      | MarCCD 133                                                             | MarCCD 225                                                                |
| Temperature (K)               | 100.0                                                                  | 100                                                                       |
| Resolution range (Å)          | 69.95 - 4.75 (5.01–4.75)                                               | 30.0 – 3.8 (3.9 – 3.8)                                                    |
| No. of unique reflections     | 67599 (9808)                                                           | 249444 (5040)                                                             |
| Completeness (%)              | 100 (100)                                                              | 56.8 (42.1)                                                               |
| Redundancy                    | 5.7 (5.7)                                                              | 2.36 (1.29)                                                               |
| $\langle I/\sigma(I) \rangle$ | 3.3 (1.3)                                                              | 4.67 (0.91)                                                               |
| $R_{\text{merge}}$            | 0.212 (0.582)                                                          | 0.173 (0.714)                                                             |
