# Supplementary material for: The Structural Basis for the Integrity of Adenovirus Ad3 Dodecahedron
Source: PubMed Central journal article supplement (PMC3457955; doi:10.1371/journal.pone.0046075), 2012-09-25
Supplement: pone.0046075.s002.pdf [file pone.0046075.s002.pdf]

**Table S2. Structure refinement and model validation.** Values for the outer shell are given in parentheses.

|                                              | <i>Cubic crystals</i>      | <i>Orthorhombic crystals</i> |
|----------------------------------------------|----------------------------|------------------------------|
| pdb entry                                    | 4aqq                       | 4ar2                         |
| Resolution range (Å)                         | 69.95 - 4.75 (4.87 - 4.75) | 20.0 – 3.8 (3.9 – 3.8)       |
| No. of reflections used in refinement        | 67517 (4489)               | 244404 (12572)               |
| Final overall $R$ factor                     | 0.291                      | 0.280                        |
| Atomic displacement model                    | isotropic                  | isotropic                    |
| Overall average $B$ factor (Å <sup>2</sup> ) | 56.4                       | 71.8                         |
| Rmsd bonds (Å)                               | 0.016                      | 0.015                        |
| Rmsd angles (°)                              | 2.5                        | 2.4                          |
| Final $R_{\text{work}}$                      | 0.291 (0.328)              | 0.280 (0.454)                |
| No. of reflections for $R_{\text{free}}$     | 3418 (267)                 | 5040 (266)                   |
| Final $R_{\text{free}}$                      | 0.290 (0.321)              | 0.278 (0.452)                |
