# Supplementary material for: The Structural Basis for the Integrity of Adenovirus Ad3 Dodecahedron
Source: PubMed Central journal article supplement (PMC3457955; doi:10.1371/journal.pone.0046075), 2012-09-25
Supplement: pone.0046075.s003.pdf [file pone.0046075.s003.pdf]

**Table S3. Oligonucleotides used to generate Dd mutants.** Changed codons are in bold. All mutations and constructs were confirmed by DNA sequence analysis.

| <b>Mutation</b>                  | <b>Direction</b> | <b>Sequence (5' – 3')</b>                              |
|----------------------------------|------------------|--------------------------------------------------------|
| A38G                             | Forward          | CCCCACTGGAG <b>GGT</b> CCCTTCGTACC                     |
| A38G                             | Reverse          | GGTACGAAGGG <b>ACC</b> CTCCAGTGGGG                     |
| A38P                             | Forward          | AGCCCCACTGGAG <b>CCT</b> CCCTTCGTACC                   |
| A38P                             | Reverse          | GGTACGAAGGG <b>GAGG</b> CTCCAGTGGGGGCT                 |
| A47R                             | Forward          | CACGGTACCT <b>GCG</b> TCCTACGGAAGG                     |
| A47R                             | Reverse          | CCTTCCGTAGG <b>ACG</b> CAGGTACCGTG                     |
| A47G                             | Forward          | CACGGTACCT <b>GGG</b> TCCTACGGAAGG                     |
| A47G                             | Reverse          | CCTTCCGTAGG <b>ACC</b> CAGGTACCGTG                     |
| <sup>59</sup> DVA <sup>61</sup>  | Forward          | CATTCGTTACTCG <b>GACGTGG</b> CTCCCCTGTACGATACCACC      |
| <sup>59</sup> DVA <sup>61</sup>  | Reverse          | GGTGGTATCGTACAGGGG <b>GAGCCACGT</b> CCGAGTAACGAATG     |
| D100R                            | Forward          | CGGTGGTGCAGAA <b>CAATCG</b> TTTTACCCCCACGGAGGC         |
| D100R                            | Reverse          | GCCTCCGTGGGGG <b>TAAAACG</b> ATTGTTCTGCACCACCG         |
| R425E                            | Forward          | CAAGACCCAGTCACCT <b>TCGAG</b> TCCACAAGACAAGTCAAC       |
| R425E                            | Reverse          | GTTGACTTGTCTTGTGG <b>ACT</b> CGAAGGTGACTGGGTCTTG       |
| R428S                            | Forward          | CACCTTCCGCTCCACAT <b>CCCA</b> AGTCAACA <b>ACT</b> ACC  |
| R428S                            | Reverse          | GGTAGTTGTTGACTT <b>GGG</b> ATGTGGAGCGGAAGGTG           |
| Pb-9                             | Forward          | GAGAATTCATGGGAGCGGTGGTG                                |
| Pb-9                             | Reverse          | GTTTCAGGTT <b>CAGGGGG</b> GAGG                         |
| Pb-40                            | Forward          | CGGAATTCTATGTT <b>CGTAC</b> CCCCACGGT                  |
| Pb-40                            | Reverse          | GTTTCAGGTT <b>CAGGGGG</b> GAGG                         |
| Pb-42                            | Forward          | TAGAATTCATGCCCCACGGTACCTGGC                            |
| Pb-42                            | Reverse          | GTTTCAGGTT <b>CAGGGGG</b> GAGG                         |
| Pb-44                            | Forward          | GAGAATTCATGCGGTACCTGGCGCCTA                            |
| Pb-44                            | Reverse          | GTTTCAGGTT <b>CAGGGGG</b> GAGG                         |
| Pb-47                            | Forward          | TCGAATTCACCGGTACATGGCGCCTAC                            |
| Pb-47                            | Reverse          | GTTTCAGGTT <b>CAGGGGG</b> GAGG                         |
| <sup>42</sup> AARA <sup>45</sup> | Forward          | GCTCCCTTCGTAG <b>CCG</b> CTCGGG <b>CC</b> CTGGCGCCTACG |
| <sup>42</sup> AARA <sup>45</sup> | Reverse          | CGTAGGCGCCAG <b>GGCC</b> CGAG <b>CGG</b> CTACGAAGGGAGC |
