# Supplementary material for: The Structural Basis for the Integrity of Adenovirus Ad3 Dodecahedron
Source: PubMed Central journal article supplement (PMC3457955; doi:10.1371/journal.pone.0046075), 2012-09-25
Supplement: pone.0046075.s005.pdf [file pone.0046075.s005.pdf]

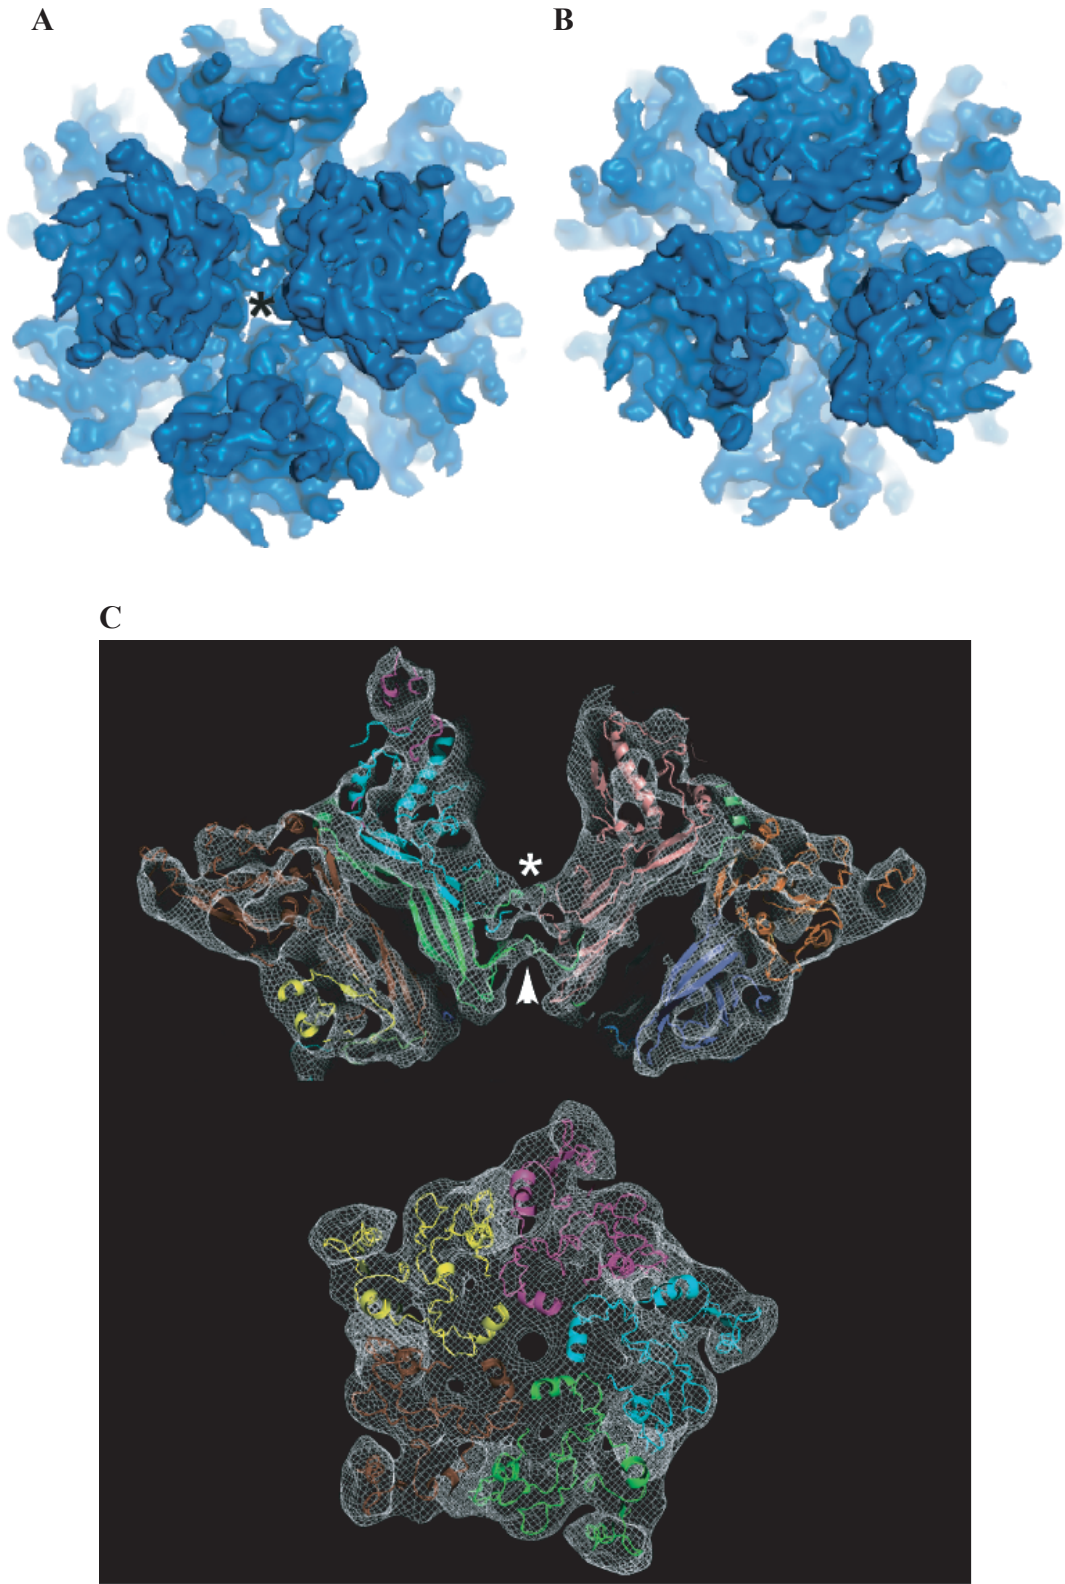

Figure S2
